# Supplementary material for: Copper hexacyanoferrate functionalized single-walled carbon nanotubes for selective cesium extraction
Source: Royal Society of Chemistry journal article supplement (doi:10.1039/c7nj00879a), 2017-01-01
Supplement: c7nj00879a1.pdf [file c7nj00879a1.pdf]

## Supplementary Information

### Copper hexacyanoferrate functionalized single-walled carbon nanotubes for selective cesium extraction

H. Draouil, L. Alvarez, J. Causse, V. Flaud, M.A. Zaïbi, J.L. Bantignies, M. Oueslati and J. Cambedouzou.

Figure S1: Schematic representation of chemical reactions involved in a) PRG grafting on SWCNT and b) Cu complexation in the first stage of CuHFC growth.

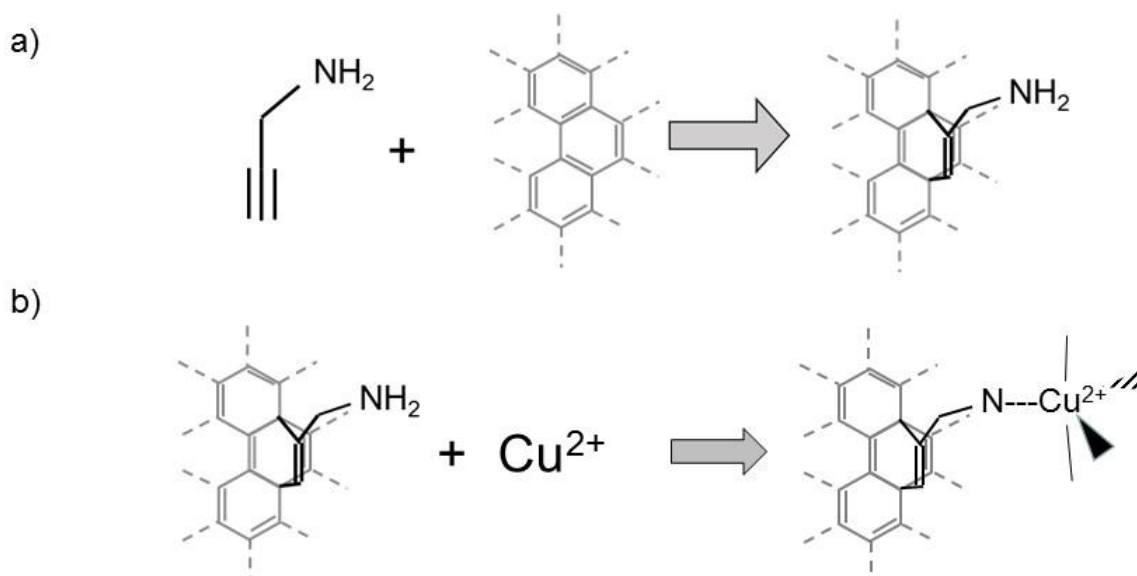

Figure S2: TEM images of a) pristine SWCNTs and b) detail of a catalytic particle surrounded by a carbon shell.

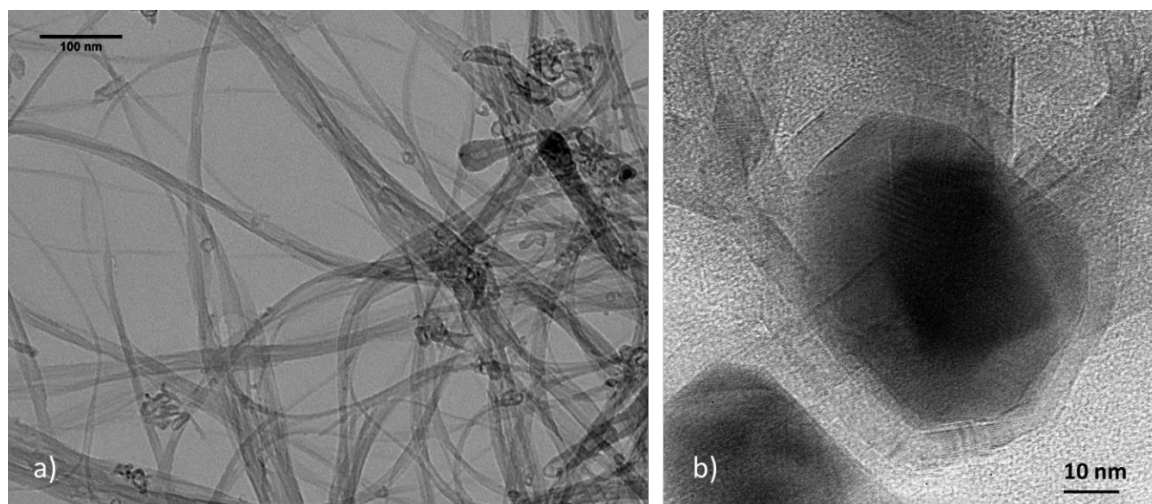

Table S1: Elemental ID and Quantification of SWCNTs\_CuHCF\_Cs [0.1 mM] according to the XPS survey

| <b>Name</b> | <b>Peak BE</b> | <b>At. %</b> |
|-------------|----------------|--------------|
| C1s         | 284.9          | 83.2         |
| N1s         | 398.8          | 7.1          |
| O1s         | 532.2          | 7.9          |
| Fe2p3       | 708.2          | 0.45         |
| Cu2p3       | 933.3          | 0.6          |
| Cs3p3       | 997.4          | 0.7          |

Table S2: Elemental ID and Quantification of SWCNTs\_CuHCF\_Cs [2 mM] according to the XPS survey

| <b>Name</b> | <b>Peak BE</b> | <b>At. %</b> |
|-------------|----------------|--------------|
| C1s         | 284.9          | 83           |
| N1s         | 398.9          | 6.6          |
| O1s         | 532.2          | 8            |
| Fe2p3       | 708.2          | 0.3          |
| Cu2p3       | 933.3          | 0.4          |
| Cs3p3       | 997.4          | 0.85         |

Table S3: Elemental ID and Quantification of SWCNTs\_CuHCF\_Cs [4 mM] according to the XPS survey

| <b>Name</b> | <b>Peak BE</b> | <b>At. %</b> |
|-------------|----------------|--------------|
| C1s         | 284.9          | 83.5         |
| N1s         | 398.8          | 7.2          |
| O1s         | 532.1          | 7.5          |
| Fe2p3       | 708.1          | 0.4          |
| Cu2p3       | 933.6          | 0.55         |
| Cs3p3       | 997.4          | 0.9          |
